# Supplementary material for: Conformationally controlled ultrafast intersystem crossing in bithiophene systems
Source: Royal Society of Chemistry journal article supplement (doi:10.1039/c8cp01419a), 2018-01-01
Supplement: c8cp01419a1.pdf [file c8cp01419a1.pdf]

## Supporting Information for “Conformationally Controlled Ultrafast Intersystem Crossing in Bithiophene Systems”

Anders B. Skov<sup>a</sup>, Martin A. B. Larsen<sup>a</sup>, Mikkel B. Liisberg<sup>a</sup>, Thorsten Hansen<sup>a</sup> and Theis I. Sølling<sup>\*a</sup>

<sup>a</sup>Department of Chemistry, University of Copenhagen, Universitetsparken 5, 2100 København Ø, Denmark.

E-mail: theis@chem.ku.dk; Fax: +45 35 32 03 22; Tel: +45 93 56 54 72

Below are given the time-resolved photoelectron spectrum (TR-PES) for 2T plotted with a logarithmic time-scale and the decay associated spectrum (DAS) for the fit of B-2T.

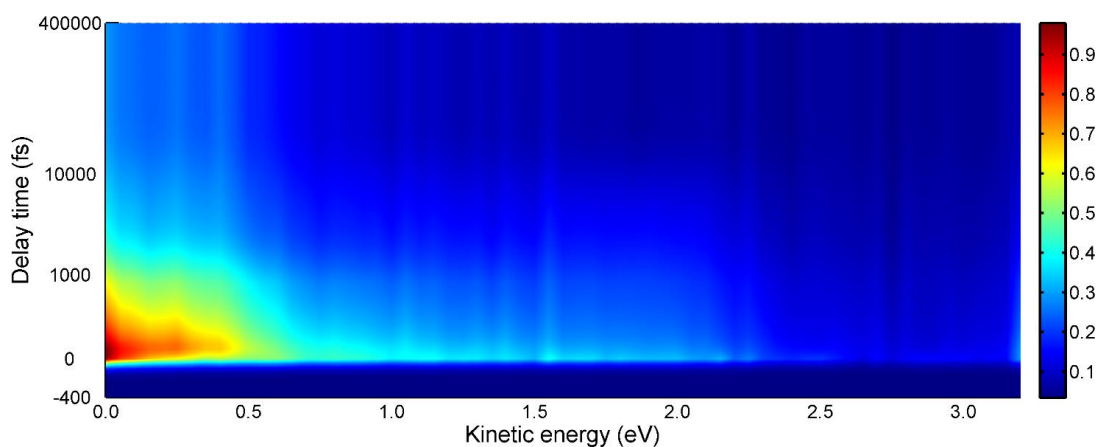

Supporting Figure 1: The TR-PES of 2T with the time (y-axis) on a log-scale.

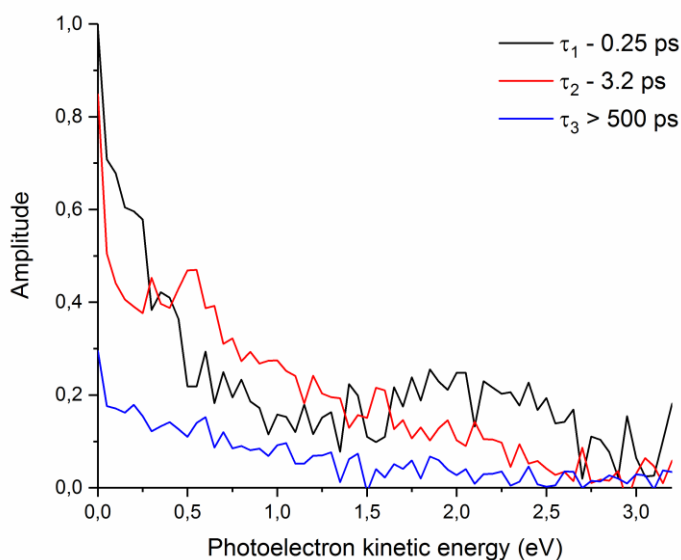

Supporting Figure 2: The DAS for B-2T, with the 0.25 ps component associated with fast intersystem crossing (ISC), the 3.2 ps component associated with ISC from the  $S_1$  minimum geometry and the >500 ps component associated with the lifetime of the final triplet state ( $T_1$ ).
